# Supplementary material for: ESG assessment methodology for emerging technologies: plasma versus conventional technology for ammonia production
Source: Royal Society of Chemistry journal article supplement (doi:10.1039/d4su00423j), 2024-12-12
Supplement: d4su00423j1.pdf [file d4su00423j1.pdf]

## Supporting Information

### ESG Assessment Methodology for Emerging Technologies: Plasma- versus Conventional Technology for Ammonia Production

Le Yu<sup>1,3\*</sup>, Amin Keilani<sup>1,2</sup>, Nam Nghiep Tran<sup>1,3</sup>, Marc Escribà-Gelonch<sup>4</sup>, Michael Goodsite<sup>3</sup>, Sukhbir Sandhu<sup>5</sup>, Harpinder Sanhu<sup>6</sup>, Volker Hessel<sup>3,7\*</sup>

<sup>1</sup> School of Chemical Engineering, Faculty of Science, Engineering and Technology, The University of Adelaide, Adelaide, Australia.

<sup>2</sup> Institute of Process and Particle Engineering, Graz University of Technology, Graz, Austria.

<sup>3</sup> Institute of Sustainability, Energy and Resources (ISER), The University of Adelaide, Adelaide, Australia.

<sup>4</sup> Centre for Workplace Excellence (CWeX), UniSA (University of South Australia) Business, University of South Australia, Adelaide, Australia.

<sup>5</sup> Future Regions Research Centre (FRRC), Federation University Australia, Ballarat, Australia.

<sup>6</sup> School of Engineering, University of Warwick, Coventry, United Kingdom.

#### 1. Environmental pillar

##### 1.1. Risk exposure

Table S1 Risk exposure criteria for environmental pillar

| Issues                   | Criteria                              | 1                                        | 2     | 3   | 4   | 5   |
|--------------------------|---------------------------------------|------------------------------------------|-------|-----|-----|-----|
| Carbon footprint         | t CO <sub>2e</sub> /t NH <sub>3</sub> | 0.018                                    | 0.069 | N/A | N/A | N/A |
| Water consumption        | water recycling                       | Minimal water consumption                |       |     |     |     |
| Toxic waste              | Total solid waste                     | No toxic waste                           |       |     |     |     |
| Opp. In renewable energy | Renewable source used                 | Renewable sources for electricity supply |       |     |     |     |

Table S2 Risk exposure score of five plasma-technology companies

| Issues                   | Risk Score | 1 | 2 | 3 | 4 | 5 |
|--------------------------|------------|---|---|---|---|---|
| Carbon footprint         |            | 2 | 3 | 2 | 2 | 2 |
| Water consumption        | 2-10       | 2 | 2 | 2 | 2 | 2 |
| Toxic waste              |            | 2 | 2 | 2 | 2 | 2 |
| Opp. In renewable energy |            | 2 | 2 | 2 | 2 | 2 |

## 1.2. Risk management

Table S3 Risk management criteria for carbon footprint issue

| Categories         | Description                                                 | Results                  | Management score |
|--------------------|-------------------------------------------------------------|--------------------------|------------------|
| Mitigation actions | 1. Use clear sources of energy                              | Positive/neutral/Passive | 1.3/0.9/0.5      |
|                    | 2. GHG capture plan                                         | Positive/neutral/Passive | 1.3/0.9/0.5      |
|                    | 3. Energy management and operational efficiency improvement | Positive/neutral/Passive | 1.3/0.9/0.5      |
|                    | 4. Reduction of future energy consumption                   | Positive/neutral/Passive | 1.3/0.9/0.5      |
| Targets            | 5. Carbon or energy efficiency improvement                  | Positive/neutral/Passive | 1.3/0.9/0.5      |
|                    | 6. Demonstrated track record of achieving target            | Positive/neutral/Passive | 1.3/0.9/0.5      |
| Performance        | 7. GHG emission reduction plan                              | Positive/neutral/Passive | 2.2/1.3/0.5      |
| <b>Total score</b> |                                                             |                          | <b>10</b>        |

Table S4 Risk management score for carbon footprint issue

| Company                                                  | 1          | 2          | 3          | 4          | 5          |
|----------------------------------------------------------|------------|------------|------------|------------|------------|
| Criteria                                                 | Score      |            |            |            |            |
| Clear sources of energy                                  | 1.3        | 0.9        | 1          | 0.5        | 0.9        |
| GHG capture plan                                         | 0.5        | 0.5        | 0.5        | 0.5        | 0.5        |
| Energy management and operational efficiency improvement | 0.5        | 0.9        | 0.9        | 0.5        | 0.9        |
| Reduction of future energy consumption                   | 0.9        | 0.9        | 0.5        | 0.5        | 0.9        |
| Carbon or energy efficiency improvement                  | 0.5        | 0.5        | 0.5        | 0.5        | 0.5        |
| Demonstrated track record of achieving target            | 0.5        | 0.5        | 0.5        | 0.5        | 0.5        |
| GHG emission reduction plan                              | 0.5        | 0.5        | 0.5        | 0.5        | 0.5        |
| <b>Total Score</b>                                       | <b>4.7</b> | <b>4.6</b> | <b>4.4</b> | <b>3.5</b> | <b>4.7</b> |

Table S5 Risk management criteria for water consumption issue

| Categories         | Description                                                       | Results                  | Management score |
|--------------------|-------------------------------------------------------------------|--------------------------|------------------|
| Mitigation actions | 1. Percentage of water consumption from alternative water sources | Positive/neutral/Passive | 1.25/0.9/0.5     |
|                    | 2. Water circulation and recycling rate                           | Positive/neutral/Passive | 1.25/0.9/0.5     |
|                    | 3. Executive body responsible for water management                | Positive/neutral/Passive | 1.25/0.9/0.5     |
|                    | 4. Water-efficient process to reduce water intensity              | Positive/neutral/Passive | 1.25/0.9/0.5     |
| Targets            | 5. Carbon or energy efficiency improvement target                 | Positive/neutral/Passive | 1.25/0.9/0.5     |
|                    | 6. Demonstrated track record of achieving target                  | Positive/neutral/Passive | 1.25/0.9/0.5     |
|                    | 7. Detailed implementation strategy to achieve the target         | Positive/neutral/Passive | 1.25/0.9/0.5     |
| Performance        | 8. Water intensity reduction plan                                 | Positive/neutral/Passive | 1.25/0.9/0.5     |
| <b>Total score</b> |                                                                   |                          | <b>10</b>        |

Table S6 Risk management score for water consumption issue

| Company                                                        | 1          | 2        | 3          | 4          | 5          |
|----------------------------------------------------------------|------------|----------|------------|------------|------------|
| Criteria                                                       | Score      |          |            |            |            |
| Percentage of water consumption from alternative water sources | 0          | 0        | 0          | 0          | 0          |
| Water circulation and recycling rate                           | 1          | 1        | 0.9        | 0.9        | 0.5        |
| Executive body responsible for water management                | 1          | 1        | 0.9        | 0.5        | 0.9        |
| Water-efficient process to reduce water intensity              | 1.2        | 1        | 0.9        | 0.5        | 0.5        |
| Carbon or energy efficiency improvement target                 | 1.2        | 1        | 0.9        | 1.2        | 1.2        |
| Demonstrated track record of achieving target                  | 0          | 0        | 0          | 0          | 0          |
| Detailed implementation strategy to achieve the target         | 0          | 0        | 0          | 0          | 0          |
| Water intensity reduction plan                                 | 0          | 0        | 0          | 0          | 0          |
| <b>Total Score</b>                                             | <b>4.4</b> | <b>4</b> | <b>3.6</b> | <b>3.1</b> | <b>3.1</b> |

Table S7 Risk management criteria for toxic waste issue

| Categories         | Description                                                                                     | Results                  | Management score |
|--------------------|-------------------------------------------------------------------------------------------------|--------------------------|------------------|
| Mitigation actions | 1. Environmental management system (EMS) setup                                                  | Positive/neutral/Passive | 2/1.2/0.5        |
|                    | 2. Percentage of sites with HAZWOPER certifications or ISO 14001                                | Positive/neutral/Passive | 2/1.2/0.5        |
| Targets            | 3. Target for toxic emission reduction                                                          | Positive/neutral/Passive | 2/1.2/0.5        |
|                    | 4. Demonstrated track record of achieving the target                                            | Positive/neutral/Passive | 2/1.2/0.5        |
|                    | 5. Detailed implementation strategy to reduce air emission, water effluents and hazardous waste | Positive/neutral/Passive | 2/1.2/0.5        |
| <b>Total score</b> |                                                                                                 |                          | <b>10</b>        |

Table S8 Risk management score for toxic waste issue

| Company                                                                                      | 1          | 2          | 3          | 4          | 5          |
|----------------------------------------------------------------------------------------------|------------|------------|------------|------------|------------|
| Criteria                                                                                     | Score      |            |            |            |            |
| Environmental management system (EMS) setup                                                  | 0.5        | 0          | 0.5        | 0.5        | 0.5        |
| Percentage of sites with HAZWOPER certifications or ISO 14001                                | 1.2        | 2          | 0.5        | 0.5        | 0.5        |
| Target for toxic emission reduction                                                          | 0.5        | 0.5        | 0.5        | 0.5        | 0.5        |
| Demonstrated track record of achieving the target                                            | 0.5        | 0.5        | 0.5        | 0.5        | 0.5        |
| Detailed implementation strategy to reduce air emission, water effluents and hazardous waste | 0.5        | 0.5        | 0.5        | 0.5        | 0.5        |
| <b>Total Score</b>                                                                           | <b>3.2</b> | <b>3.5</b> | <b>2.5</b> | <b>2.5</b> | <b>2.5</b> |

Table S9 Risk management criteria for opportunities in renewable energy issue

| Categories         | Description                                                                                 | Results                  | Management score |
|--------------------|---------------------------------------------------------------------------------------------|--------------------------|------------------|
| Strategy           | 1. Target to increase investment and develop strategies in clean tech                       | Positive/neutral/Passive | 2/1.2/0.5        |
| Initiatives        | 2. Application of alternative energy including solar, wind, hydrogen, and waste energy      | Positive/neutral/Passive | 2/1.2/0.5        |
|                    | 3. Optimization of techniques and systems for efficiency improvement                        | Positive/neutral/Passive | 2/1.2/0.5        |
|                    | 4. Control and prevention of pollution including remediation, recycling, and carbon capture | Positive/neutral/Passive | 2/1.2/0.5        |
| Performance        | 5. Revenue derived from clean tech activities                                               | Positive/neutral/Passive | 2/1.2/0.5        |
| <b>Total score</b> |                                                                                             |                          | <b>10</b>        |

Table S10 Risk management score for opportunities in renewable energy issue

| Company                                                                                  | 1          | 2          | 3          | 4          | 5          |
|------------------------------------------------------------------------------------------|------------|------------|------------|------------|------------|
| Criteria                                                                                 | Score      |            |            |            |            |
| Target to increase investment and develop strategies in clean tech                       | 2          | 1.2        | 0.5        | 0.5        | 0.5        |
| Application of alternative energy including solar, wind, hydrogen, and waste energy      | 1.2        | 2          | 1.2        | 1.2        | 1.2        |
| Optimization of techniques and systems for efficiency improvement                        | 1.2        | 0.5        | 1.2        | 0.5        | 1.2        |
| Control and prevention of pollution including remediation, recycling, and carbon capture | 0.5        | 0.5        | 1.2        | 1.2        | 1.2        |
| Revenue derived from clean tech activities                                               | 0          | 0          | 0          | 0          | 0          |
| <b>Total Score</b>                                                                       | <b>4.5</b> | <b>4.2</b> | <b>4.1</b> | <b>3.9</b> | <b>4.1</b> |

## 2. Social pillar

### 2.1. Risk exposure

Table S11 Risk exposure criteria for occupational safety

| PSIF Rate* | TRI Rate* | PS Index* | Score |
|------------|-----------|-----------|-------|
| > 2        | > 2       | > 20      | 10    |
| 1.8        | 1.8       | 30        | 9     |
| 1.5        | 1.5       | 40        | 8     |
| 1.3        | 1.3       | 50        | 7     |
| 1.1        | 1.1       | 60        | 6     |
| 0.8        | 0.8       | 70        | 5     |
| 0.5        | 0.5       | 80        | 4     |
| 0.3        | 0.3       | 90        | 3     |
| < 0.1      | < 0.1     | 100       | 2     |

\*Note: PSIF: potential severe injury & fatality, TRI: total recordable incidents, PS: process safety.

Table S12 Risk exposure criteria for human capital development

| Employee engagement | Score | Human right                                    | Description                | Score     | Health and Well-being                             | Score       |
|---------------------|-------|------------------------------------------------|----------------------------|-----------|---------------------------------------------------|-------------|
| < 10                | 10    | Stakeholder Engagement                         | Disengage, neutral, engage | 1/0.6/0.3 | Health Services, Life Insurance, Pension Coverage | 2.5/1.5/0.5 |
| 10                  | 9     | Application of Human Rights Standard           | Disengage, neutral, engage | 1/0.6/0.3 |                                                   |             |
| 20                  | 8     | Assessment of Severity of Human Rights Impacts | Disengage, neutral, engage | 1/0.6/0.3 | Working Flexibility (hours and location)          | 2.5/1.5/0.5 |
| 30                  | 7     | Inclusion of Impact Mitigation Measures        | Disengage, neutral, engage | 1/0.6/0.3 |                                                   |             |
| 40                  | 6     | Remediation of Negative Impacts                | Disengage, neutral, engage | 1/0.6/0.3 | Sick Leave and Parental Leave                     | 2.5/1.5/0.5 |
| 50                  | 5     | Accountability and Transparency                | 100-10%                    | 0.2-1     |                                                   |             |
| 60                  | 4     | Percentage of Human Rights Training            | 10-80%                     | 0.2-1     | Health Care Facilities/Subsidies Coverage         | 2.5/1.5/0.5 |
| 70                  | 3     | Equity of Employees                            | 50-10%                     | 0.2-1     |                                                   |             |
| > 80                | 2     | Diversity of Employees                         | 80-10%                     | 0.2-1     |                                                   |             |
| <b>Total score</b>  |       |                                                |                            | <b>10</b> | <b>Total score</b>                                | <b>10</b>   |

Table S13 Risk exposure criteria for product liability

| <b>Chemical safety</b>                                                                       | <b>Description</b>                                               | <b>Score</b> |
|----------------------------------------------------------------------------------------------|------------------------------------------------------------------|--------------|
| Possible presence of harmful chemicals in their product portfolio (containing SVHC and SIN*) | Yes/No                                                           | 2/0.5        |
| Exposure to the pending chemical regulations in the regions in which company operates        | Proportion of a company's total sales in each geographic segment | 2-8          |
| <b>Total score</b>                                                                           |                                                                  | <b>10</b>    |

\*Note: SVHC: substances of very high concerns, SIN: Substitute it now.

## 2.2. Risk management

Table S14 Risk management criteria for occupational safety

| <b>Categories</b>  | <b>Description</b>                                                                     | <b>Results</b>           | <b>Management score</b> |
|--------------------|----------------------------------------------------------------------------------------|--------------------------|-------------------------|
| Strategy           | 1 Group-wide H&S policy has been established                                           | Positive/neutral/Passive | 1.25/0.9/0.5            |
|                    | 2 H&S policy has applied to contractors with a regular audit                           | Positive/neutral/Passive | 1.25/0.9/0.5            |
|                    | 3 Percentage of company's H&S system certified to OHSAS 18001 or ISO 45001 (above 20%) | Positive/neutral/Passive | 1.25/0.9/0.5            |
|                    | 4 Executive body is responsible for H&S strategy and performance                       | Positive/neutral/Passive | 1.25/0.9/0.5            |
| Targets            | 5 H&S targets cover target year, reduction (%) and baseline                            | Positive/neutral/Passive | 1.25/0.9/0.5            |
|                    | 6 Implementation strategy to achieve targets                                           | Positive/neutral/Passive | 1.25/0.9/0.5            |
|                    | 7 Demonstrated track record of achieving target                                        | Positive/neutral/Passive | 1.25/0.9/0.5            |
| Performance        | 8 H&S metrics include lost time incident rate, TRI rate and Fatalities                 | Positive/neutral/Passive | 1.25/0.9/0.5            |
| <b>Total score</b> |                                                                                        |                          | <b>10</b>               |

Table S15 Risk management score for occupational safety

| <b>Company</b>                                                                       | <b>1</b>     | <b>2</b>   | <b>3</b>   | <b>4</b> | <b>5</b> |
|--------------------------------------------------------------------------------------|--------------|------------|------------|----------|----------|
| <b>Criteria</b>                                                                      | <b>Score</b> |            |            |          |          |
| Group-wide H&S policy has been established                                           | 0.5          | 0.5        | 0.5        | 0.5      | 0.5      |
| H&S policy has applied to contractors with a regular audit                           | 0.5          | 0.5        | 0.5        | 0.5      | 0.5      |
| Percentage of company's H&S system certified to OHSAS 18001 or ISO 45001 (above 20%) | 0.9          | 1          | 0.9        | 0.5      | 0.5      |
| Executive body is responsible for H&S strategy and performance                       | 0.9          | 0.9        | 0.9        | 0.5      | 0.5      |
| H&S targets cover target year, reduction (%) and baseline                            | 0.5          | 0.5        | 0.5        | 0.5      | 0.5      |
| Implementation strategy to achieve targets                                           | 0.5          | 0.9        | 0.5        | 0.5      | 0.5      |
| Demonstrated track record of achieving target                                        | 0.5          | 0.5        | 0.5        | 0.5      | 0.5      |
| H&S metrics include lost time incident rate, TRI rate and Fatalities                 | 0.5          | 0.5        | 0.5        | 0.5      | 0.5      |
| <b>Total Score</b>                                                                   | <b>4.8</b>   | <b>5.3</b> | <b>4.8</b> | <b>4</b> | <b>4</b> |



Table S16 Risk management criteria for human capital development

| Categories         | Description                                                                                    | Results                  | Management score |
|--------------------|------------------------------------------------------------------------------------------------|--------------------------|------------------|
| Strategy           | 1 Formal grievance reporting or escalation procedures                                          | Positive/neutral/Passive | 1.6/1/0.4        |
|                    | 2 Company monitors employee satisfaction on a regular basis                                    | Positive/neutral/Passive | 1.6/1/0.4        |
| Targets            | 3 Company provides employee stock ownership plan (ESOP) or employee stock purchase plan (ESPP) | Positive/neutral/Passive | 1.6/1/0.4        |
|                    | 4 Company provides job-specific development training programs                                  | Positive/neutral/Passive | 1.6/1/0.4        |
|                    | 5 Company provides leadership training and talent management programs                          | Positive/neutral/Passive | 1.6/1/0.4        |
| Performance        | 6 Percentage annual employee turnover                                                          | 10%-80%                  | 2-0.2            |
| <b>Total score</b> |                                                                                                |                          | <b>10</b>        |

Table S17 Risk management score for human capital development

| Company                                                                                      | 1          | 2          | 3          | 4          | 5          |
|----------------------------------------------------------------------------------------------|------------|------------|------------|------------|------------|
| Criteria                                                                                     | Score      |            |            |            |            |
| Formal grievance reporting or escalation procedures                                          | 0.4        | 0.4        | 0.4        | 0.4        | 0.4        |
| Company monitors employee satisfaction on a regular basis                                    | 0.4        | 0.4        | 0.4        | 0.4        | 0.4        |
| Company provides employee stock ownership plan (ESOP) or employee stock purchase plan (ESPP) | 0.4        | 0.4        | 0.4        | 0.4        | 0.4        |
| Company provides job-specific development training programs                                  | 1.3        | 1.3        | 1          | 1          | 1          |
| Company provides leadership training and talent management programs                          | 0.4        | 0.4        | 0.4        | 0.4        | 0.4        |
| Percentage annual employee turnover                                                          | 2          | 2          | 2          | 2          | 2          |
| <b>Total Score</b>                                                                           | <b>4.9</b> | <b>4.9</b> | <b>4.6</b> | <b>4.6</b> | <b>4.6</b> |

Table S18 Risk management criteria for product liability

| Categories         | Description                                                                               | Results | Management score |
|--------------------|-------------------------------------------------------------------------------------------|---------|------------------|
| Strategy           | 1 Phase-out plan has covered the hazardous chemicals and products                         | Yes/No  | 2/0              |
| Targets            | 2 Demonstrated track record of introducing viable alternatives to high-concern substances | Yes/No  | 2/0              |
|                    | 3 Initiatives to improve consumer awareness on product chemical content                   | Yes/No  | 2/0              |
|                    | 4 Company conducts hazard assessments of its substances or products                       | Yes/No  | 2/0              |
|                    | 5 Company discloses substance registrations and use                                       | Yes/No  | 2/0              |
| <b>Total score</b> |                                                                                           |         | <b>10</b>        |

Table S19 Risk management score for product liability

| Company                                                                                 | 1          | 2          | 3        | 4        | 5        |
|-----------------------------------------------------------------------------------------|------------|------------|----------|----------|----------|
| Criteria                                                                                | Score      |            |          |          |          |
| Phase-out plan has covered the hazardous chemicals and products                         | 0          | 0          | 0        | 0        | 0        |
| Demonstrated track record of introducing viable alternatives to high-concern substances | 0.5        | 0.5        | 0        | 0        | 0        |
| Initiatives to improve consumer awareness on product chemical content                   | 1          | 1          | 1        | 1        | 1        |
| Company conducts hazard assessments of its substances or products                       | 1.5        | 1.5        | 1.5      | 1.5      | 1.5      |
| Company discloses substance registrations and use                                       | 0.5        | 0.5        | 0.5      | 0.5      | 0.5      |
| <b>Total Score</b>                                                                      | <b>3.5</b> | <b>3.5</b> | <b>3</b> | <b>3</b> | <b>3</b> |
